# Supplementary material
Source: PubMed Central journal article supplement (PMC8132552)
Supplement: mmc1.pdf [file mmc1.pdf]

**Table S1.** Description of signs and/or symptoms of the healthcare workers with mild COVID-19 disease.

| Patients | Gender | Age (years) | Fever | Cough | Change in taste | Change in smell |
|----------|--------|-------------|-------|-------|-----------------|-----------------|
| Pt 1     | F      | 52          | x     |       |                 |                 |
| Pt 2     | F      | 33          |       |       | x               | x               |
| Pt 3     | F      | 46          | x     |       |                 |                 |
| Pt 4     | M      | 48          | x     | x     | x               | x               |
| Pt 5     | M      | 32          | x     | x     | x               | x               |
| Pt 6     | F      | 53          | x     | x     |                 |                 |
| Pt 7     | F      | 47          | x     |       |                 |                 |
| Pt 8     | F      | 49          | x     | x     |                 |                 |
| Pt 9     | M      | 54          | x     | x     |                 |                 |
| Pt 10    | F      | 45          | x     | x     |                 |                 |
| Pt 11    | F      | 46          | x     | x     |                 |                 |
| Pt 12    | M      | 62          | x     | x     |                 |                 |
| Pt 13    | F      | 52          |       | x     |                 |                 |
| Pt 14    | F      | 44          | x     | x     |                 |                 |
| Pt 15    | F      | 43          | x     |       |                 |                 |
| Pt 16    | M      | 34          | x     |       |                 |                 |
| Pt 17    | M      | 42          | x     | x     |                 |                 |
| Total    |        |             | 15    | 11    | 3               | 3               |
